# Supplementary material for: A Missing Nuclearity in the Co(III)/Ln(III)/2-Pyridyladoxime Chemistry: Tetranuclear Compounds Using the “Assisted Self-Assembly” Approach (Ln = Rare Earth Metals)
Source: MDPI journal article supplement (doi:10.3390/chemistry5020068), 2023-04-27
Supplement: s1 [file s1]

*Supplementary Materials to*

**A Missing Nuclearity in the Co(III)/Ln(III)/2-pyridyladoxime Chemistry: Tetranuclear Compounds Using the “Assisted Self-Assembly” Approach (Ln= Rare Earth Metals)**

**Zoi G. Lada<sup>1,2,\*</sup>, Eugenia Katsoulakou<sup>2</sup>, Christina D. Polyzou<sup>3</sup>, Catherine P. Raptopoulou<sup>3,\*</sup>, and Vassilis Psycharis<sup>3</sup>**

<sup>1</sup> Foundation for Research and Technology-Hellas, Institute of Chemical Engineering Sciences, (FORTH/ICE-HT), Stadiou Str. Platani, 265 04 Patras, Greece

<sup>2</sup> Department of Chemistry, University of Patras, GR-265 00 Rio-Patras, Greece

<sup>3</sup> Institute of Nanoscience and Nanotechnology, NCSR “Demokritos”, 153 10 Aghia Paraskevi Attikis, Greece

\* Correspondence: ZGL: [zoilada@iceht.forth.gr](mailto:zoilada@iceht.forth.gr), [zoilada@upatras.gr](mailto:zoilada@upatras.gr); Tel.: +30-2610965241, CPR: [raptopoulou@inn.demokritos.gr](mailto:raptopoulou@inn.demokritos.gr); Tel.: +30-2106503346

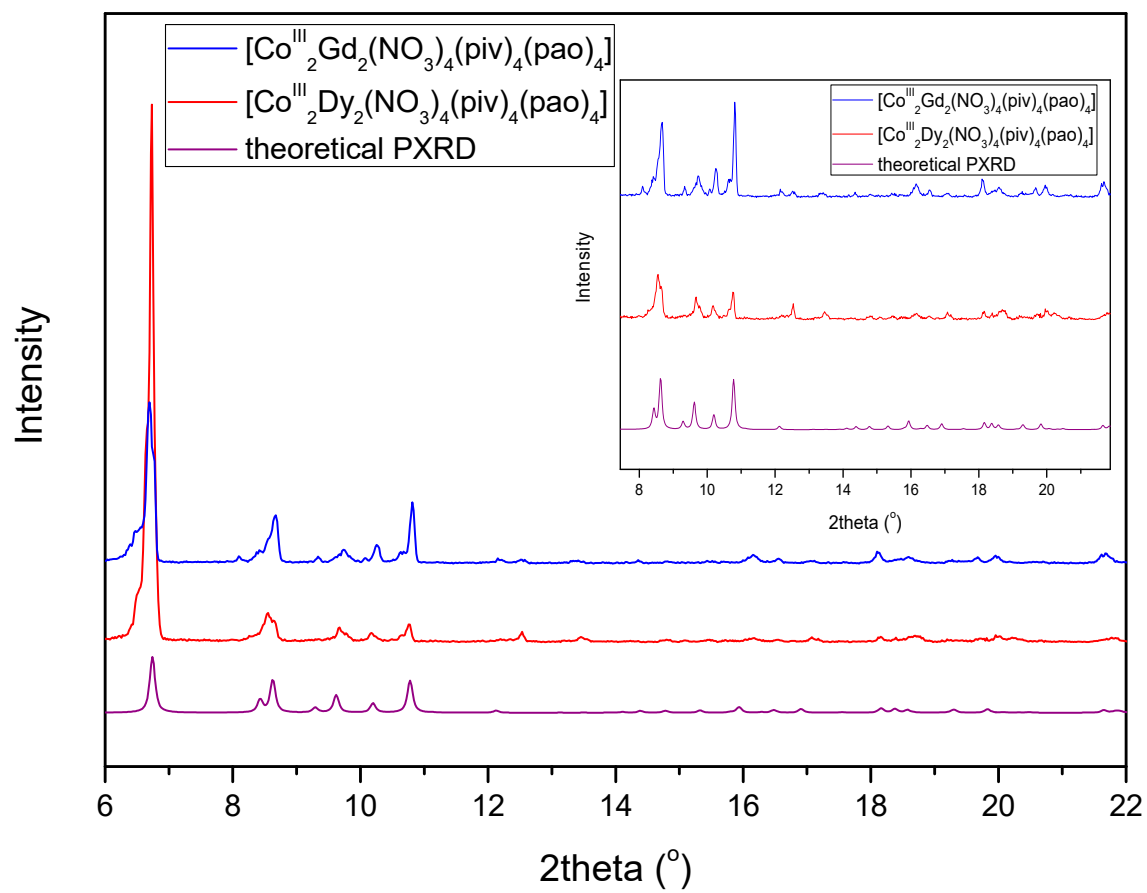

**Figure S1.** Comparison of the theoretical PXRD diagram of 1·2MeCN with the experimental ones for **1** and **2**.

## S2 Infrared (FT-IR) Spectroscopic Characterization

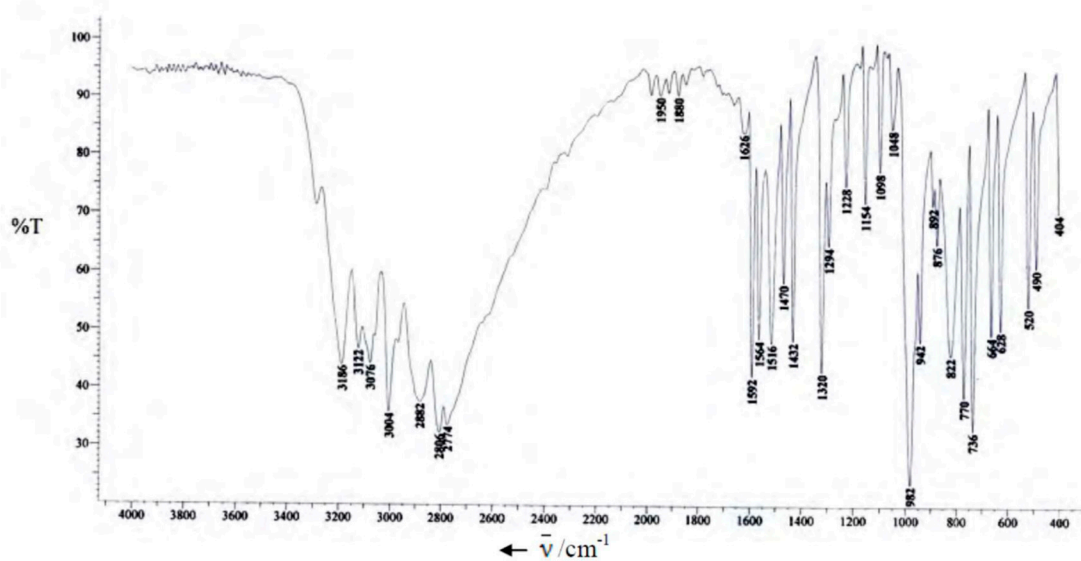

**Figure S2.** The FT-IR spectrum ( $\text{KBr}/\text{cm}^{-1}$ ) of free paoH.

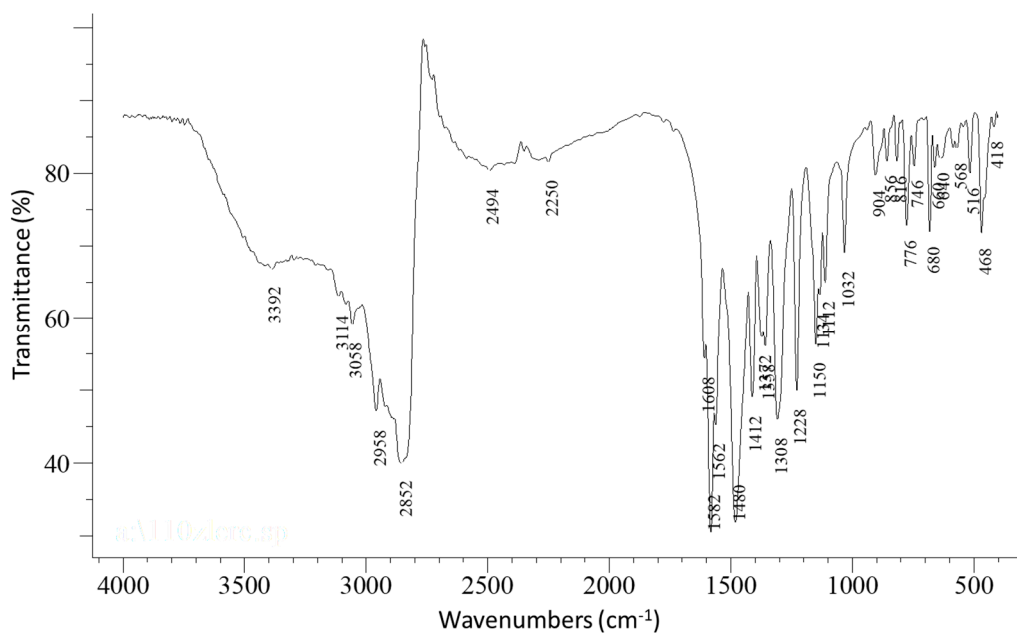

**Figure S3.** The FT-IR spectrum ( $\text{KBr}, \text{cm}^{-1}$ ) of a well-dried (i.e., without lattice MeCN) sample of  $[\text{Co}^{\text{III}}_2\text{Pr}_2(\text{NO}_3)_4(\text{piv})_4(\text{pao})_4]$  (**4**).

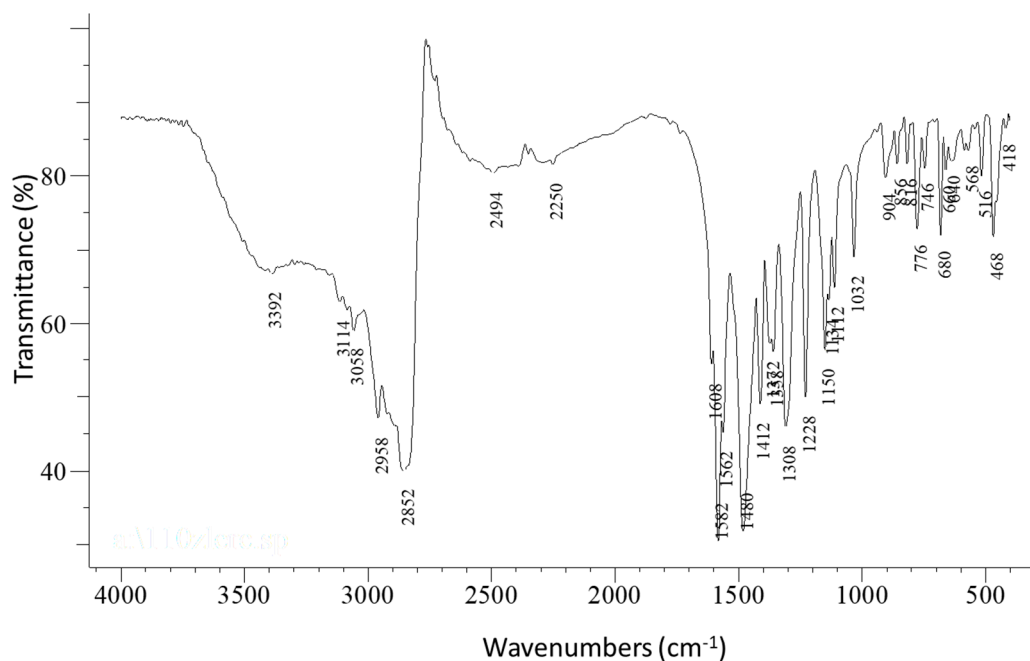

**Figure S4.** The FT-IR spectrum (KBr, cm<sup>-1</sup>) of a well-dried (i.e., without lattice MeCN) sample of [Co<sup>III</sup><sub>2</sub>Gd<sub>2</sub>(NO<sub>3</sub>)<sub>4</sub>(piv)<sub>4</sub>(pao)<sub>4</sub>] (2).

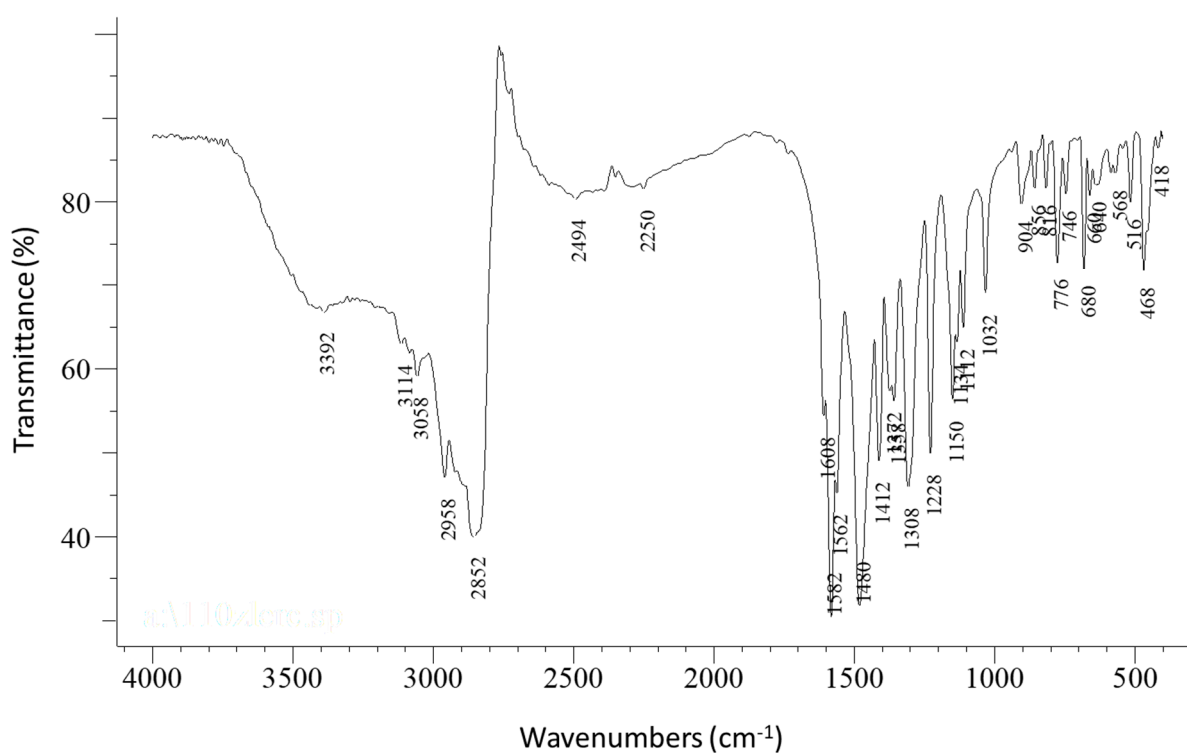

**Figure S5.** The FT-IR spectrum (KBr, cm<sup>-1</sup>) of a well-dried (i.e., without lattice MeCN) sample of [Co<sup>III</sup><sub>2</sub>Tb<sub>2</sub>(NO<sub>3</sub>)<sub>4</sub>(piv)<sub>4</sub>(pao)<sub>4</sub>] (3).

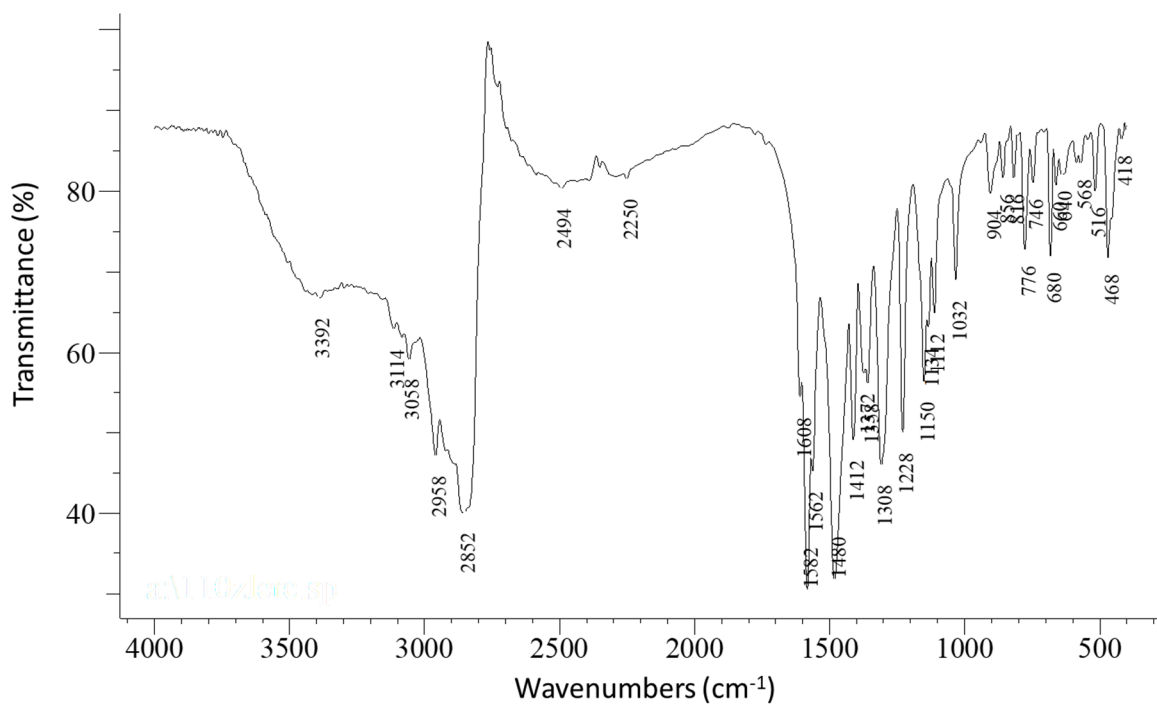

**Figure S6.** The FT-IR spectrum (KBr, cm<sup>-1</sup>) of a well-dried (i.e., without lattice MeCN) sample of [Co<sup>III</sup><sub>2</sub>Y<sub>2</sub>(NO<sub>3</sub>)<sub>4</sub>(piv)<sub>4</sub>(pao)<sub>4</sub>] (5).

### S3 Crystal Lattice Interactions

**Table S1.** Intra- and intermolecular interactions in the crystal structure of 12MeCN.

| Interaction          | D...A (Å)              | H...A (Å) | D-H...A (°) |
|----------------------|------------------------|-----------|-------------|
|                      | intramolecular         |           |             |
| C(6)-H(6)···N(4)     | 3.019                  | 2.534     | 111.9       |
|                      | intermolecular         |           |             |
| C(6)-H(6)···N(4)     | 3.019                  | 2.534     | 111.9       |
| C(12)-H(12)···O(5)   | 2.962                  | 2.462     | 112.8       |
|                      | with the MeCN solvents |           |             |
| C(2S)-H(2S1)···O(9)  | 3.522                  | 2.587     | 159.7       |
| C(2S)-H(2S2)···O(11) | 3.413                  | 2.580     | 142.9       |
